# Supplementary material
Source: publisher figshare collection journal article supplement (https://aacr.figshare.com/articles/dataset/_/22506363)
Supplement: Supplementary file 1 [file 39966705]

Supplemental Figure 2

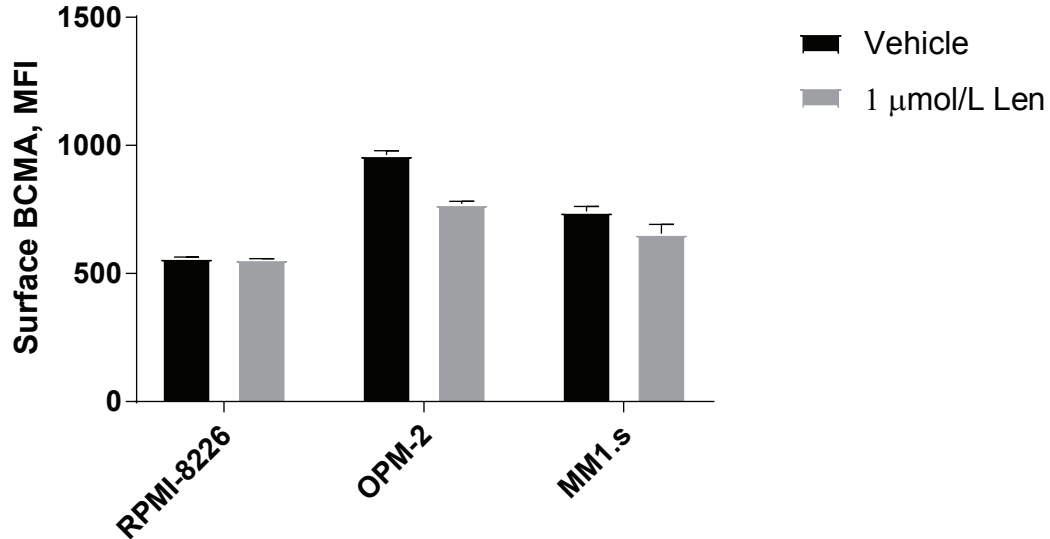

Supplementary Figure 2. Multiple myeloma cell lines were stained treated with vehicle or 1 μmol/L lenalidomide, stained with live/dead marker and anti-BCMA antibody, and then analyzed by flow cytometry for surface BCMA expression. MFI, median fluorescence intensity.
